# Supplementary material for: CD160 isoforms and regulation of CD4 and CD8 T-cell responses
Source: PubMed Central journal article supplement (PMC4163173; doi:10.1186/s12967-014-0217-y), 2014-09-02

Additional File 2

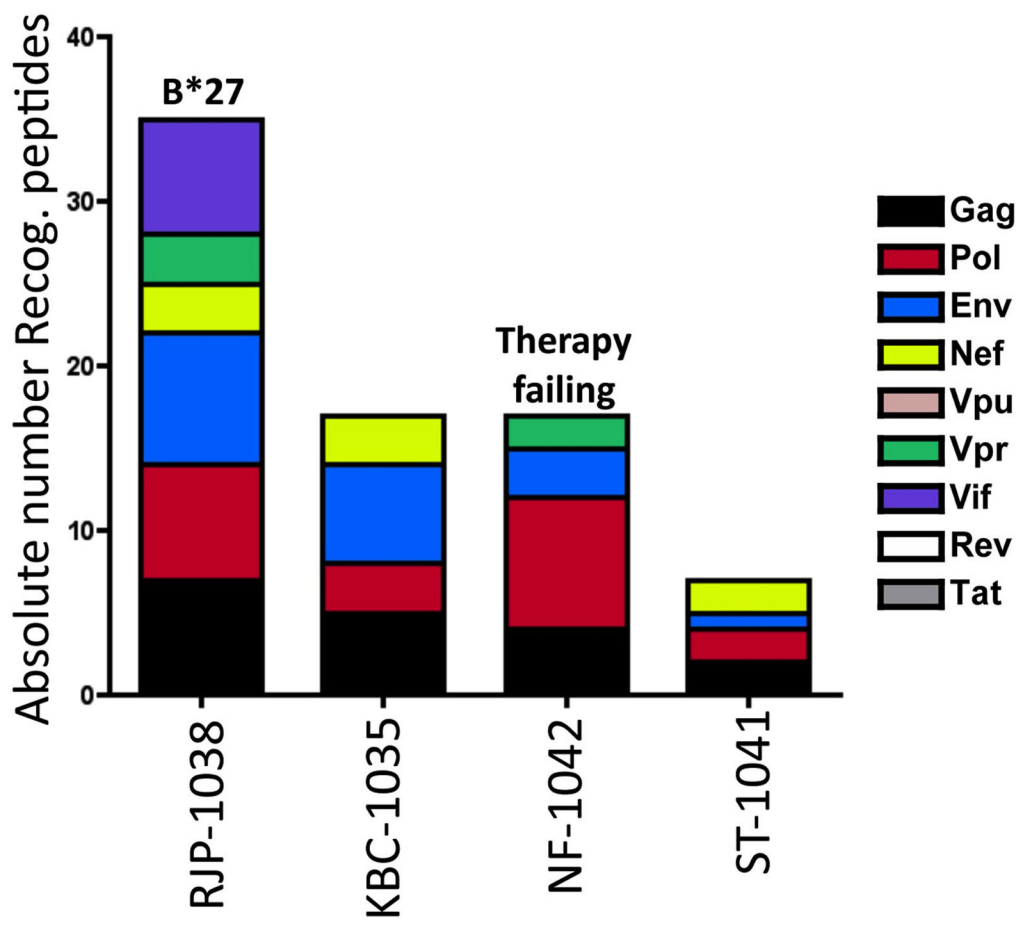

Supplement: 12967_2014_217_MOESM2_ESM.pdf [file 12967_2014_217_MOESM2_ESM.pdf]
