# Supplementary material for: CD160 isoforms and regulation of CD4 and CD8 T-cell responses
Source: PubMed Central journal article supplement (PMC4163173; doi:10.1186/s12967-014-0217-y), 2014-09-02

NF-1042  
(CEFT peptide pool)

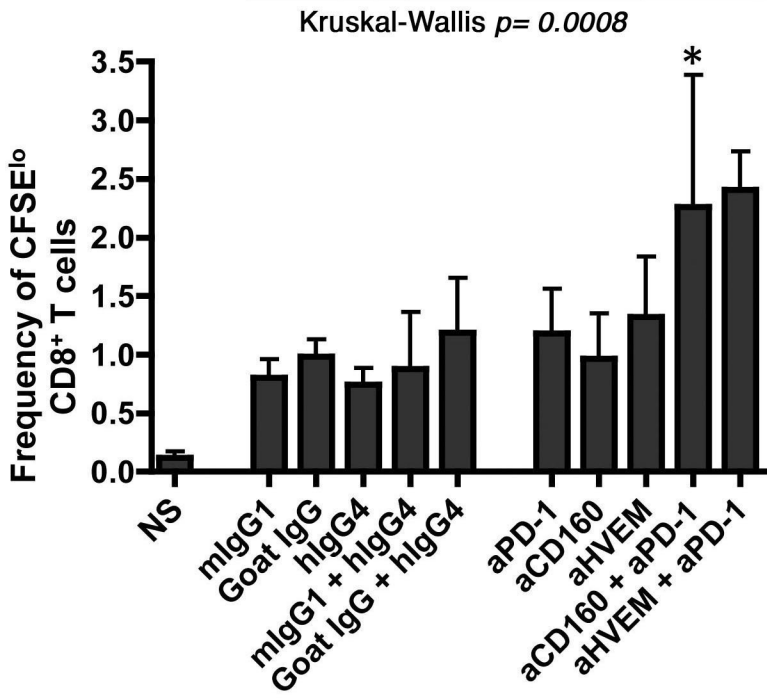

KBC-1035  
(CEFT peptide pool)

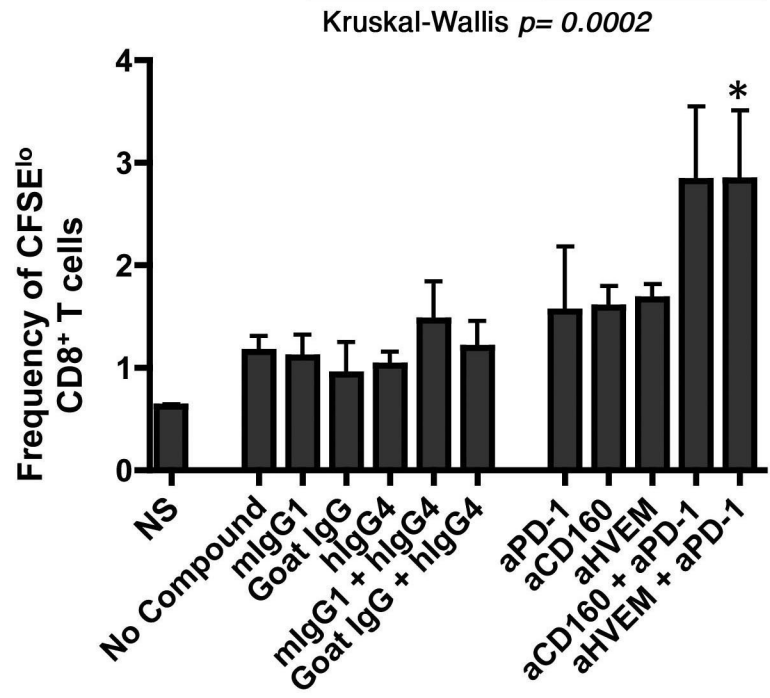

ST-1041  
(CEFT peptide pool)

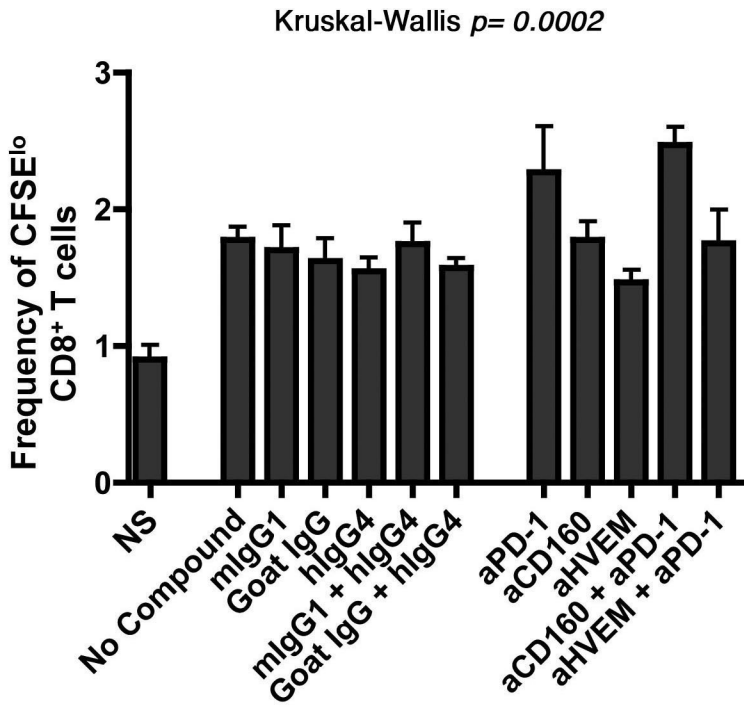

RJP-1038  
(CEFT peptide pool)

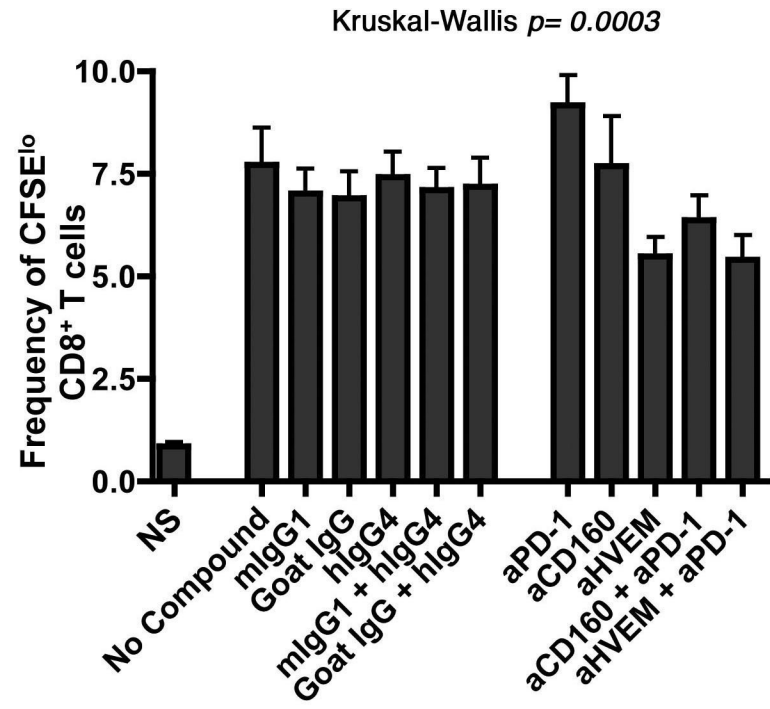

Supplement: 12967_2014_217_MOESM3_ESM.pdf [file 12967_2014_217_MOESM3_ESM.pdf]
