# Supplementary material for: CD160 isoforms and regulation of CD4 and CD8 T-cell responses
Source: Springer Nature journal article supplement (doi:10.1186/s12967-014-0217-y), 2014-09-01

A)

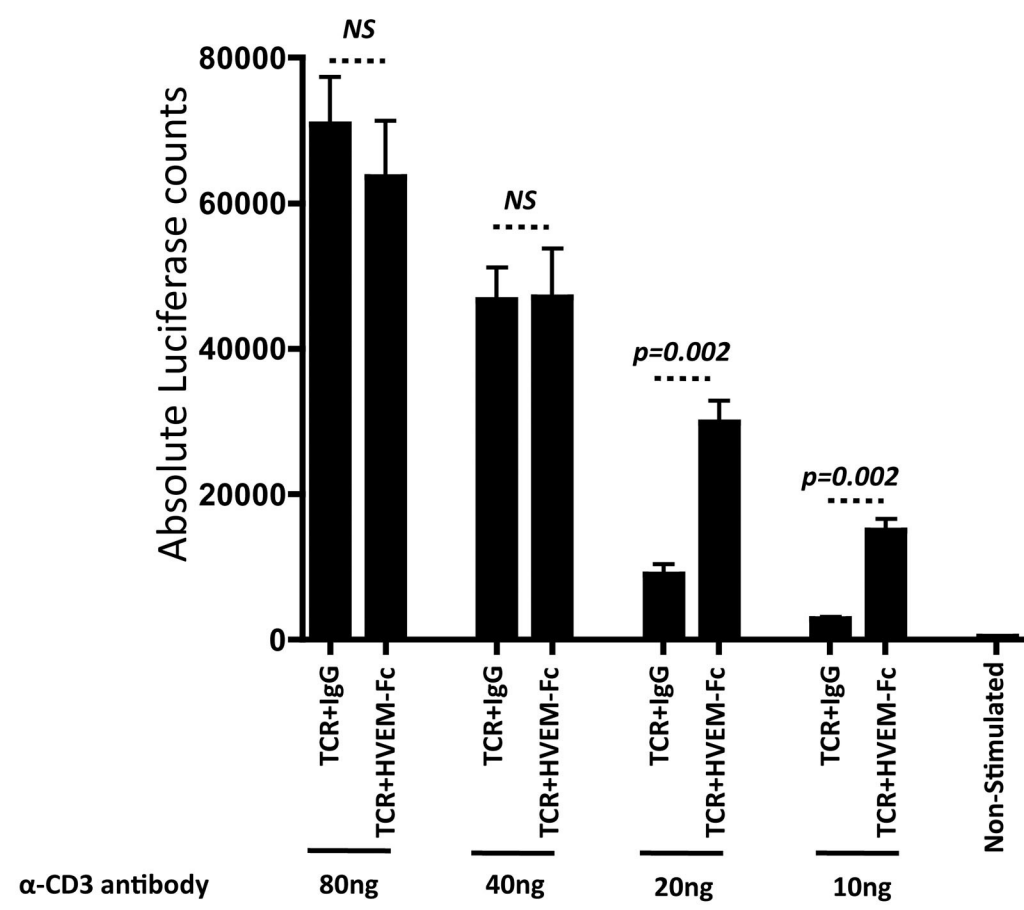

B)

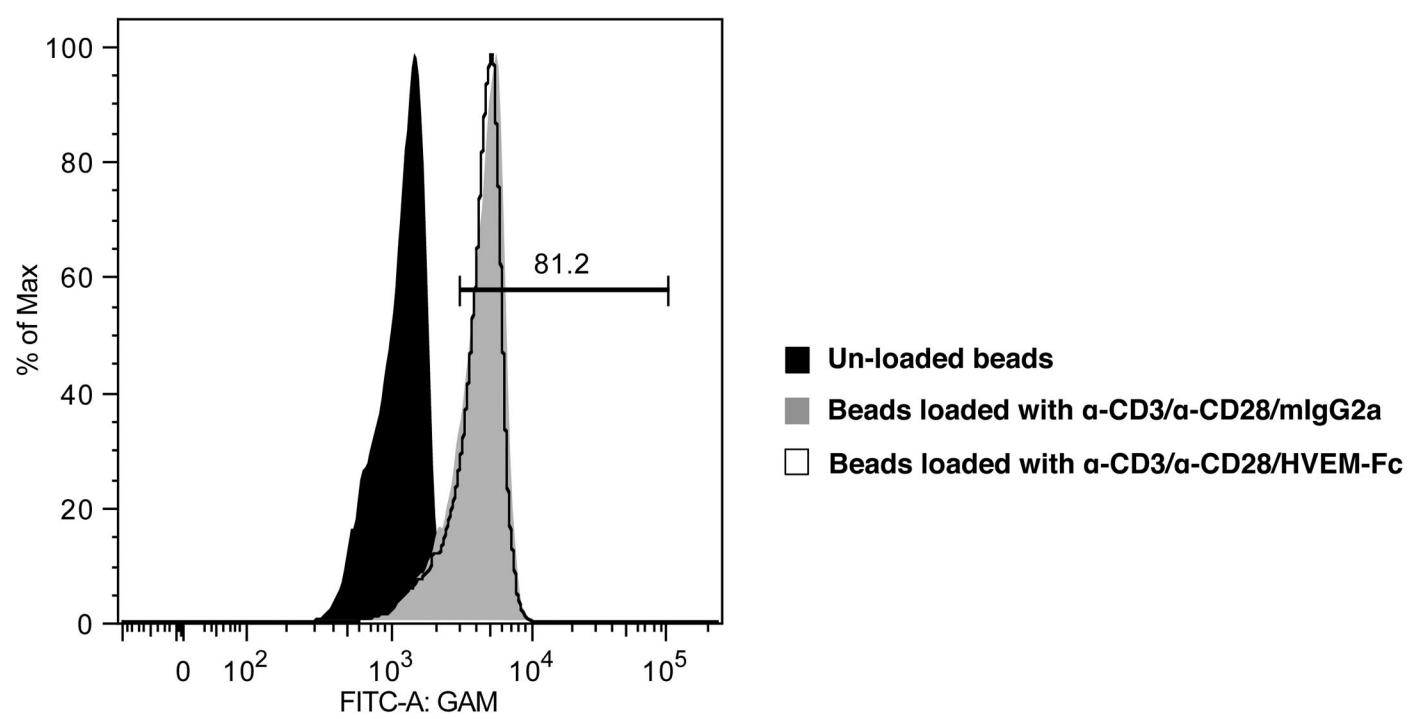

Supplement: MOESM1 [file 9766290]
